# Supplementary material for: Agrin is a novel oncogenic protein in thyroid cancer
Source: PubMed Central journal article supplement — Oncol Lett. 2023 Sep 25;26(5):483. doi: 10.3892/ol.2023.14070 (PMC10561154; doi:10.3892/ol.2023.14070), 2023-09-25
Supplement: Supplementary_Data.pdf [file Supplementary_Data.pdf]

Table SI. Expression of agrin correlates with neutrophil infiltration in patients with THCA.

| Infiltrate                                 | $\rho$ | P-value                | Adjusted P-value       |
|--------------------------------------------|--------|------------------------|------------------------|
| T cell CD8+ central memory_XCELL           | -0.19  | 2.73x10 <sup>-5</sup>  | 0.000238               |
| T cell CD8+ effector memory_XCELL          | -0.10  | 0.035829               | 0.101643               |
| T cell CD8+ naive_XCELL                    | -0.11  | 0.012747               | 0.045429               |
| T cell CD8+_CIBERSORT                      | -0.19  | 3.64x10 <sup>-5</sup>  | 0.000291               |
| T cell CD8+_CIBERSORT-ABS                  | -0.04  | 0.375246               | 0.572894               |
| T cell CD8+_EPIC                           | 0.17   | 0.000229               | 0.001429               |
| T cell CD8+_QUANTISEQ                      | -0.01  | 0.88296                | 0.959739               |
| T cell CD8+_TIMER                          | 0.49   | 6.60x10 <sup>-31</sup> | 2.64x10 <sup>-28</sup> |
| T cell CD8+_XCELL                          | -0.22  | 8.32x10 <sup>-7</sup>  | 1.58x10 <sup>-5</sup>  |
| T cell CD4+ (non-regulatory)_QUANTISEQ     | -0.24  | 5.38x10 <sup>-8</sup>  | 1.25x10 <sup>-6</sup>  |
| T cell CD4+ (non-regulatory)_XCELL         | -0.03  | 0.502435               | 0.716717               |
| T cell CD4+ central memory_XCELL           | 0.07   | 0.109793               | 0.261254               |
| T cell CD4+ effector memory_XCELL          | -0.10  | 0.021061               | 0.080768               |
| T cell CD4+ memory activated_CIBERSORT     | 0.02   | 0.59218                | 0.780715               |
| T cell CD4+ memory activated_CIBERSORT-ABS | 0.02   | 0.595246               | 0.781803               |
| T cell CD4+ memory resting_CIBERSORT       | 0.07   | 0.106346               | 0.257532               |
| T cell CD4+ memory resting_CIBERSORT-ABS   | 0.09   | 0.052856               | 0.157571               |
| T cell CD4+ memory_XCELL                   | -0.07  | 0.128469               | 0.289973               |
| T cell CD4+ naive_CIBERSORT                | -0.05  | 0.320796               | 0.525786               |
| T cell CD4+ naive_CIBERSORT-ABS            | -0.04  | 0.325784               | 0.530658               |
| T cell CD4+ naive_XCELL                    | -0.16  | 0.000481               | 0.003761               |
| T cell CD4+ Th1_XCELL                      | -0.31  | 4.79x10 <sup>-12</sup> | 2.91x10 <sup>-10</sup> |
| T cell CD4+ Th2_XCELL                      | -0.12  | 0.005936               | 0.031903               |
| T cell CD4+_EPIC                           | 0.33   | 6.12x10 <sup>-14</sup> | 4.83x10 <sup>-12</sup> |
| T cell CD4+_TIMER                          | -0.13  | 0.004538               | 0.02507                |
| T cell regulatory (Tregs)_CIBERSORT        | 0.13   | 0.003876               | 0.02219                |
| T cell regulatory (Tregs)_CIBERSORT-ABS    | 0.11   | 0.011883               | 0.054469               |
| T cell regulatory (Tregs)_QUANTISEQ        | 0.12   | 0.010853               | 0.050731               |
| T cell regulatory (Tregs)_XCELL            | 0.09   | 0.037443               | 0.125872               |
| B cell memory_CIBERSORT                    | -0.05  | 0.235512               | 0.494082               |

|                                    |       |                        |                        |
|------------------------------------|-------|------------------------|------------------------|
| B cell memory_CIBERSORT-ABS        | -0.05 | 0.26585                | 0.511499               |
| B cell memory_XCELL                | -0.22 | 1.47x10 <sup>-6</sup>  | 3.39x10 <sup>-5</sup>  |
| B cell naive_CIBERSORT             | -0.04 | 0.355857               | 0.58497                |
| B cell naive_CIBERSORT-ABS         | -0.02 | 0.671447               | 0.833033               |
| B cell naive_XCELL                 | -0.09 | 0.047275               | 0.16784                |
| B cell plasma_CIBERSORT            | -0.08 | 0.072888               | 0.23262                |
| B cell plasma_CIBERSORT-ABS        | -0.02 | 0.735008               | 0.866414               |
| B cell plasma_XCELL                | -0.37 | 6.05x10 <sup>-17</sup> | 1.21x10 <sup>-14</sup> |
| B cell_EPIC                        | -0.09 | 0.042587               | 0.153928               |
| B cell_QUANTISEQ                   | -0.10 | 0.030217               | 0.129727               |
| B cell_TIMER                       | -0.11 | 0.014048               | 0.074591               |
| B cell_XCELL                       | -0.14 | 0.002658               | 0.019692               |
| Class-switched memory B cell_XCELL | -0.04 | 0.367068               | 0.592046               |
| Monocyte_CIBERSORT                 | 0.03  | 0.47661                | 0.678636               |
| Monocyte_CIBERSORT-ABS             | 0.12  | 0.007402               | 0.033195               |
| Monocyte_QUANTISEQ                 | -0.15 | 0.00074                | 0.005518               |
| Monocyte_XCELL                     | -0.06 | 0.209219               | 0.386813               |
| Macrophage M0_CIBERSORT            | 0.10  | 0.022154               | 0.061255               |
| Macrophage M0_CIBERSORT-ABS        | 0.10  | 0.029932               | 0.075458               |
| Macrophage M1_CIBERSORT            | -0.15 | 0.000756               | 0.004494               |
| Macrophage M1_CIBERSORT-ABS        | -0.11 | 0.017065               | 0.050437               |
| Macrophage M1_QUANTISEQ            | 0.22  | 8.42x10 <sup>-7</sup>  | 1.12x10 <sup>-5</sup>  |
| Macrophage M1_XCELL                | -0.19 | 1.59x10 <sup>-5</sup>  | 0.000142               |
| Macrophage M2_CIBERSORT            | 0.20  | 9.20x10 <sup>-6</sup>  | 9.36x10 <sup>-5</sup>  |
| Macrophage M2_CIBERSORT-ABS        | 0.21  | 2.44x10 <sup>-6</sup>  | 2.76x10 <sup>-5</sup>  |
| Macrophage M2_QUANTISEQ            | -0.10 | 0.020546               | 0.057339               |
| Macrophage M2_TIDE                 | -0.15 | 0.000979               | 0.005596               |
| Macrophage M2_XCELL                | -0.28 | 4.63x10 <sup>-10</sup> | 1.26x10 <sup>-8</sup>  |
| Macrophage_EPIC                    | 0.07  | 0.122201               | 0.23425                |
| Macrophage_TIMER                   | 0.18  | 3.93x10 <sup>-5</sup>  | 0.000314               |
| Macrophage_XCELL                   | -0.16 | 0.000427               | 0.002695               |
| Neutrophil_CIBERSORT               | 0.04  | 0.371156               | 0.576022               |
| Neutrophil_CIBERSORT-ABS           | 0.04  | 0.325021               | 0.530942               |

|                                                |       |                        |                        |
|------------------------------------------------|-------|------------------------|------------------------|
| Neutrophil_MCPCOUNTER                          | 0.57  | 1.02x10 <sup>-42</sup> | 4.88x10 <sup>-40</sup> |
| Neutrophil_QUANTISEQ                           | 0.41  | 9.24x10 <sup>-21</sup> | 1.47x10 <sup>-18</sup> |
| Neutrophil_TIMER                               | 0.37  | 1.86x10 <sup>-17</sup> | 1.77x10 <sup>-15</sup> |
| Neutrophil_XCELL                               | 0.09  | 0.057916               | 0.157863               |
| Myeloid dendritic cell activated_CIBERSORT     | 0.28  | 6.28x10 <sup>-10</sup> | 2.25x10 <sup>-8</sup>  |
| Myeloid dendritic cell activated_CIBERSORT-ABS | 0.29  | 8.59x10 <sup>-11</sup> | 3.86x10 <sup>-9</sup>  |
| Myeloid dendritic cell activated_XCELL         | -0.12 | 0.010568               | 0.051616               |
| Myeloid dendritic cell resting_CIBERSORT       | 0.11  | 0.011535               | 0.055584               |
| Myeloid dendritic cell resting_CIBERSORT-ABS   | 0.10  | 0.021515               | 0.085823               |
| Myeloid dendritic cell_MCPCOUNTER              | -0.03 | 0.528159               | 0.756556               |
| Myeloid dendritic cell_QUANTISEQ               | -0.19 | 3.04x10 <sup>-5</sup>  | 0.000411               |
| Myeloid dendritic cell_TIMER                   | 0.37  | 4.13x10 <sup>-17</sup> | 7.41x10 <sup>-15</sup> |
| Myeloid dendritic cell_XCELL                   | 0.01  | 0.775305               | 0.90959                |
| NK cell activated_CIBERSORT                    | -0.14 | 0.001475               | 0.01103                |
| NK cell activated_CIBERSORT-ABS                | 0.01  | 0.787897               | 0.913924               |
| NK cell resting_CIBERSORT                      | 0.02  | 0.59916                | 0.801671               |
| NK cell resting_CIBERSORT-ABS                  | 0.04  | 0.368034               | 0.619709               |
| NK cell_EPIC                                   | -0.12 | 0.006374               | 0.034936               |
| NK cell_QUANTISEQ                              | 0.19  | 2.45x10 <sup>-5</sup>  | 0.000349               |
| NK cell_XCELL                                  | -0.12 | 0.006532               | 0.035528               |
| Plasmacytoid dendritic cell_XCELL              | -0.25 | 1.11x10 <sup>-8</sup>  | 2.95x10 <sup>-7</sup>  |
| Cancer associated fibroblast_EPIC              | 0.23  | 4.94x10 <sup>-7</sup>  | 3.49x10 <sup>-6</sup>  |
| Cancer associated fibroblast_MCPCOUNTER        | 0.14  | 0.002305               | 0.007827               |
| Cancer associated fibroblast_TIDE              | 0.41  | 1.65x10 <sup>-21</sup> | 1.19x10 <sup>-19</sup> |
| Cancer associated fibroblast_XCELL             | -0.22 | 1.27x10 <sup>-6</sup>  | 7.76x10 <sup>-6</sup>  |
| Mast cell activated_CIBERSORT                  | 0.16  | 0.000367               | 0.001437               |
| Mast cell activated_CIBERSORT-ABS              | 0.18  | 8.51x10 <sup>-5</sup>  | 0.000374               |
| Mast cell resting_CIBERSORT                    | -0.06 | 0.159777               | 0.27132                |
| Mast cell resting_CIBERSORT-ABS                | -0.06 | 0.218978               | 0.344244               |
| Mast cell_XCELL                                | 0.29  | 7.36x10 <sup>-11</sup> | 1.07x10 <sup>-9</sup>  |
| Cancer associated fibroblast_EPIC              | 0.23  | 4.94x10 <sup>-7</sup>  | 3.49x10 <sup>-6</sup>  |
| Cancer associated fibroblast_MCPCOUNTER        | 0.14  | 0.002305               | 0.007827               |
| Cancer associated fibroblast_TIDE              | 0.41  | 1.65x10 <sup>-21</sup> | 1.19x10 <sup>-19</sup> |

|                                        |       |                       |                       |
|----------------------------------------|-------|-----------------------|-----------------------|
| Cancer associated fibroblast_XCELL     | -0.22 | 1.27x10 <sup>-6</sup> | 7.76x10 <sup>-6</sup> |
| Common lymphoid progenitor_XCELL       | 0.09  | 0.044959              | 0.116023              |
| Common myeloid progenitor_XCELL        | -0.02 | 0.611798              | 0.764748              |
| Endothelial cell_EPIC                  | 0.03  | 0.556911              | 0.701296              |
| Endothelial cell_MCPCOUNTER            | 0.11  | 0.014171              | 0.049416              |
| Endothelial cell_XCELL                 | -0.11 | 0.016323              | 0.0562                |
| Eosinophil_CIBERSORT                   | -0.08 | 0.086242              | 0.212507              |
| Eosinophil_CIBERSORT-ABS               | -0.08 | 0.088656              | 0.215307              |
| Eosinophil_XCELL                       | 0.17  | 0.000103              | 0.000604              |
| Granulocyte-monocyte progenitor_XCELL  | 0.01  | 0.829208              | 0.913136              |
| Hematopoietic stem cell_XCELL          | -0.10 | 0.02569               | 0.085635              |
| T cell follicular helper_CIBERSORT     | -0.12 | 0.006134              | 0.030669              |
| T cell follicular helper_CIBERSORT-ABS | 0.00  | 0.93091               | 0.971385              |
| T cell gamma delta_CIBERSORT           | -0.16 | 0.000272              | 0.002614              |
| T cell gamma delta_CIBERSORT-ABS       | -0.16 | 0.000293              | 0.002707              |
| T cell gamma delta_XCELL               | 0.09  | 0.052286              | 0.142583              |
| MDSC_TIDE                              | 0.25  | 1.16x10 <sup>-8</sup> | 2.32x10 <sup>-7</sup> |
| T cell NK_XCELL                        | -0.02 | 0.668403              | 0.74267               |

Analyses were performed using Timer (n=509). THCA, thyroid carcinoma.
